# Supplementary material for: Detecting structural variations with precise breakpoints using low-depth WGS data from a single oxford nanopore MinION flowcell
Source: PubMed Central journal article supplement (PMC8927474; doi:10.1038/s41598-022-08576-4), 2022-03-16
Supplement: 41598_2022_8576_MOESM1_ESM.pdf [file 41598_2022_8576_MOESM1_ESM.pdf]

# Supplementary Material

## Detecting Structural Variations with Precise Breakpoints using Low-Depth WGS Data from a Single Oxford Nanopore MinION Flowcell

Henry CM Leung<sup>1,†</sup>, Huijing Yu<sup>1,†</sup>, Yifan Zhang<sup>1,†</sup>, Wing Sze Leung<sup>1</sup>, Ivan FM Lo<sup>2</sup>, Ho Ming Luk<sup>2</sup>, Wai-Chun Law<sup>3</sup>, Ka Kui Ma<sup>1</sup>, Chak Lim Wong<sup>1</sup>, Yat Sing Wong<sup>1</sup>, Ruibang Luo<sup>1,\*</sup>, Tak-Wah Lam<sup>1,\*</sup>

<sup>1</sup>Department of Computer Science, The University of Hong Kong, Hong Kong

<sup>2</sup>Clinical Genetic Service, Department of Health, Hong Kong

<sup>3</sup>L3 Bioinformatics Limited, Hong Kong

\*Corresponding author contact: [rbluo@cs.hku.hk](mailto:rbluo@cs.hku.hk)

\*Corresponding author contact: [twlam@cs.hku.hk](mailto:twlam@cs.hku.hk)

<sup>†</sup>these authors contributed equally to this work

## Table of Contents

|                                                                                                                                                                         |           |
|-------------------------------------------------------------------------------------------------------------------------------------------------------------------------|-----------|
| <b><i>S.1. The number of reported SV in different types detected by the software for the datasets</i></b>                                                               | <b>3</b>  |
| <b><i>S.2. Performance of the software using simulated datasets and HG002</i></b>                                                                                       | <b>8</b>  |
| <b><i>S.3. Performance of SENSV, NanoVar<sup>1</sup>, Sniffles<sup>2</sup>, SVIM<sup>3</sup> and cuteSV<sup>4</sup> on the simulated datasets for individual SV</i></b> | <b>9</b>  |
| <b><i>S.4. CPU Usage of SENSV for Simulated Datasets and low-depth HG002</i></b>                                                                                        | <b>11</b> |
| <b><i>S.5. The Algorithm of SV-DP</i></b>                                                                                                                               | <b>12</b> |
| <b><i>S.6. Depth variability of the reference dataset in SENSV</i></b>                                                                                                  | <b>14</b> |
| <b><i>S.7. Parameters and software version used for calling SV for low-depth (4x) WGS data</i></b>                                                                      | <b>15</b> |
| <b><i>S.8. Commands and parameters used for the evaluation</i></b>                                                                                                      | <b>16</b> |
| <b><i>Reference</i></b>                                                                                                                                                 | <b>17</b> |

S.1. The number of reported SV in different types detected by the software for the datasets

| Dataset ID       | Number of predicted deletions |         |          |        |        |
|------------------|-------------------------------|---------|----------|--------|--------|
|                  | SENSV                         | NanoVar | Sniffles | SVIM   | cuteSV |
| HG002            | 1,850                         | 1,209   | 984      | 2,280  | 843    |
| simulated data A | 81                            | 37      | 52       | 200    | 29     |
| simulated data B | 55                            | 26      | 46       | 212    | 22     |
| 1                | 1,513                         | 1,278   | 1,027    | 2,078  | 831    |
| 2                | 1,431                         | 1,353   | 1,172    | 2,129  | 945    |
| 3                | 1,743                         | 1,146   | 732      | 2,207  | 599    |
| 4                | 1,612                         | 1,176   | 794      | 2,036  | 658    |
| 5                | 3,395                         | 1,514   | 1,062    | 4,970  | 848    |
| 6                | 17,209                        | 3,692   | 1,375    | 17,783 | 834    |
| 7                | 1,353                         | 1,192   | 973      | 1,715  | 791    |
| 8                | 1,792                         | 1,320   | 1,192    | 2,983  | 1,016  |
| 9                | 1,515                         | 1,294   | 1,014    | 1,982  | 786    |
| 10               | 2,868                         | 1,474   | 1,362    | 4,534  | 1,090  |
| 11               | 1,675                         | 1,282   | 805      | 2,489  | 640    |
| 12               | 2,195                         | 1,428   | 779      | 2,832  | 639    |
| 13               | 3,476                         | 1,498   | 1,510    | 4,649  | 1,168  |
| 14               | 35,848                        | 4,137   | 2,118    | 35,169 | 950    |
| 15               | 1,413                         | 1,220   | 968      | 2,031  | 798    |
| 16               | 2,275                         | 1,355   | 1,301    | 3,683  | 1,059  |
| 17               | 3,930                         | 1,437   | 1,657    | 6,666  | 1,342  |
| 18               | 1,750                         | 1,404   | 1,294    | 2,781  | 1,091  |
| 19               | 1,100                         | 1,165   | 455      | 973    | 362    |
| 20               | 1,543                         | 1,211   | 964      | 1,767  | 800    |
| 21               | 2,197                         | 1,423   | 1,359    | 3,411  | 1,225  |
| 22               | 1,195                         | 1,183   | 786      | 1,425  | 644    |
| 23               | 2,002                         | 1,317   | 965      | 2,085  | 792    |
| 24               | 2,218                         | 1,366   | 992      | 2,670  | 835    |

**Table S1.** The number of reported deletions by each software.

| Dataset ID       | Number of predicted duplications |         |          |       |        |
|------------------|----------------------------------|---------|----------|-------|--------|
|                  | SENSV                            | NanoVar | Sniffles | SVIM  | cuteSV |
| HG002            | 285                              | 1,882   | 759      | 2,730 | 1,837  |
| simulated data A | 31                               | 27      | 36       | 216   | 26     |
| simulated data B | 29                               | 40      | 41       | 242   | 36     |
| 1                | 190                              | 2,225   | 784      | 2,191 | 2,516  |
| 2                | 209                              | 2,502   | 903      | 2,370 | 2,825  |
| 3                | 140                              | 1,568   | 514      | 2,006 | 1,683  |
| 4                | 190                              | 1,837   | 572      | 1,950 | 1,964  |
| 5                | 276                              | 3,017   | 776      | 3,501 | 1,839  |
| 6                | 218                              | 2,962   | 755      | 2,042 | 2,094  |
| 7                | 200                              | 1,779   | 667      | 1,901 | 2,105  |
| 8                | 200                              | 2,236   | 933      | 3,120 | 2,473  |
| 9                | 160                              | 2,562   | 697      | 1,914 | 1,823  |
| 10               | 276                              | 3,030   | 1,085    | 3,805 | 2,966  |
| 11               | 139                              | 2,128   | 599      | 2,075 | 1,833  |
| 12               | 137                              | 2,245   | 621      | 2,195 | 2,081  |
| 13               | 333                              | 4,177   | 1,246    | 3,825 | 3,773  |
| 14               | 283                              | 2,769   | 843      | 2,692 | 2,404  |
| 15               | 154                              | 2,208   | 704      | 2,064 | 1,627  |
| 16               | 236                              | 2,606   | 972      | 3,591 | 2,691  |
| 17               | 506                              | 3,672   | 1,145    | 6,787 | 3,520  |
| 18               | 182                              | 2,662   | 872      | 3,159 | 2,552  |
| 19               | 149                              | 1,610   | 247      | 928   | 1,040  |
| 20               | 175                              | 2,062   | 610      | 1,765 | 1,738  |
| 21               | 246                              | 2,670   | 935      | 4,037 | 2,735  |
| 22               | 155                              | 1,756   | 535      | 1,556 | 1,353  |
| 23               | 157                              | 2,244   | 665      | 1,838 | 2,126  |
| 24               | 240                              | 2,572   | 679      | 2,240 | 2,108  |

**Table S2.** The number of reported duplications by each software.

| Dataset ID       | Number of predicted inversions |         |          |      |        |
|------------------|--------------------------------|---------|----------|------|--------|
|                  | SENSV                          | NanoVar | Sniffles | SVIM | cuteSV |
| HG002            | 233                            | 1,261   | 634      | 351  | 637    |
| simulated data A | 11                             | 20      | 69       | 115  | 56     |
| simulated data B | 7                              | 24      | 85       | 129  | 61     |
| 1                | 141                            | 1,194   | 600      | 439  | 608    |
| 2                | 72                             | 1,360   | 708      | 463  | 722    |
| 3                | 103                            | 975     | 478      | 428  | 466    |
| 4                | 159                            | 1,076   | 448      | 394  | 484    |
| 5                | 167                            | 1,280   | 700      | 502  | 675    |
| 6                | 256                            | 1,256   | 594      | 420  | 596    |
| 7                | 96                             | 1,071   | 573      | 329  | 604    |
| 8                | 226                            | 1,194   | 776      | 574  | 822    |
| 9                | 176                            | 1,240   | 597      | 404  | 625    |
| 10               | 411                            | 1,381   | 861      | 645  | 922    |
| 11               | 219                            | 1,153   | 444      | 324  | 496    |
| 12               | 125                            | 1,236   | 476      | 370  | 496    |
| 13               | 271                            | 1,615   | 986      | 697  | 1,017  |
| 14               | 233                            | 1,244   | 724      | 579  | 767    |
| 15               | 240                            | 1,163   | 636      | 453  | 636    |
| 16               | 167                            | 1,286   | 897      | 660  | 937    |
| 17               | 114                            | 1,413   | 1,391    | 849  | 1,336  |
| 18               | 118                            | 1,333   | 853      | 523  | 903    |
| 19               | 192                            | 1,258   | 190      | 117  | 210    |
| 20               | 207                            | 1,112   | 566      | 346  | 606    |
| 21               | 160                            | 1,437   | 1,026    | 633  | 1102   |
| 22               | 98                             | 1,052   | 444      | 255  | 482    |
| 23               | 177                            | 1,275   | 545      | 303  | 582    |
| 24               | 237                            | 1,278   | 589      | 329  | 577    |

**Table S3.** The number of reported inversions by each software.

| Dataset ID       | Number of predicted translocations (reported as "BND") |         |          |       |        |
|------------------|--------------------------------------------------------|---------|----------|-------|--------|
|                  | SENSV                                                  | NanoVar | Sniffles | SVIM  | cuteSV |
| HG002            | 1,276                                                  | 8,422   | 1,609    | 1,289 | 1,550  |
| simulated data A | 21                                                     | 150     | 61       | 14    | 30     |
| simulated data B | 20                                                     | 170     | 65       | 12    | 34     |
| 1                | 116                                                    | 5,720   | 1,543    | 1,363 | 1,488  |
| 2                | 101                                                    | 6,238   | 1,718    | 1,581 | 1,677  |
| 3                | 209                                                    | 5,942   | 1,185    | 941   | 1,004  |
| 4                | 91                                                     | 5,254   | 1,206    | 1,110 | 1,122  |
| 5                | 1,101                                                  | 8,832   | 2,035    | 1,690 | 1,876  |
| 6                | 164                                                    | 5,938   | 1,547    | 1,284 | 1,421  |
| 7                | 92                                                     | 5,230   | 1,375    | 1,076 | 1,259  |
| 8                | 867                                                    | 6,998   | 2,138    | 1,917 | 2,062  |
| 9                | 80                                                     | 5,672   | 1,501    | 1,334 | 1,443  |
| 10               | 751                                                    | 6,970   | 2,265    | 1,964 | 2,250  |
| 11               | 490                                                    | 7,106   | 1,383    | 1,154 | 1,310  |
| 12               | 462                                                    | 7,802   | 1,432    | 1,179 | 1,326  |
| 13               | 682                                                    | 7,058   | 2,486    | 2,085 | 2,404  |
| 14               | 269                                                    | 6,156   | 1,719    | 1,429 | 1,595  |
| 15               | 128                                                    | 5,512   | 1,401    | 1,182 | 1,314  |
| 16               | 883                                                    | 6,688   | 2,340    | 2,052 | 2,263  |
| 17               | 972                                                    | 7,378   | 3,358    | 2,505 | 3,422  |
| 18               | 1,053                                                  | 6,976   | 2,451    | 1,826 | 2,336  |
| 19               | 87                                                     | 4,904   | 655      | 382   | 576    |
| 20               | 89                                                     | 5,554   | 1,463    | 1,190 | 1,404  |
| 21               | 861                                                    | 6,898   | 2,594    | 2,012 | 2,518  |
| 22               | 76                                                     | 5,254   | 1,187    | 996   | 1,084  |
| 23               | 111                                                    | 5,542   | 1,449    | 1,065 | 1,319  |
| 24               | 592                                                    | 6,628   | 1,775    | 1,358 | 1,645  |

**Table S4.** The number of reported translocations by each software.

| Dataset ID       | Total  |         |          |        | cuteSV |
|------------------|--------|---------|----------|--------|--------|
|                  | SENSV  | NanoVar | Sniffles | SVIM   |        |
| HG002            | 3,644  | 12,774  | 3,986    | 6,650  | 4,867  |
| simulated data A | 144    | 234     | 218      | 545    | 141    |
| simulated data B | 111    | 260     | 237      | 595    | 153    |
| 1                | 1,960  | 10,417  | 3,954    | 6,071  | 5,443  |
| 2                | 1,813  | 11,453  | 4,501    | 6,543  | 6,169  |
| 3                | 2,195  | 9,631   | 2,909    | 5,582  | 3,752  |
| 4                | 2,052  | 9,343   | 3,020    | 5,490  | 4,228  |
| 5                | 4,939  | 14,643  | 4,573    | 10,663 | 5,238  |
| 6                | 17,847 | 13,848  | 4,271    | 21,529 | 4,945  |
| 7                | 1,741  | 9,272   | 3,588    | 5,021  | 4,759  |
| 8                | 3,085  | 11,748  | 5,039    | 8,594  | 6,373  |
| 9                | 1,931  | 10,768  | 3,809    | 5,634  | 4,677  |
| 10               | 4,306  | 12,855  | 5,573    | 10,948 | 7,228  |
| 11               | 2,523  | 11,669  | 3,231    | 6,042  | 4,279  |
| 12               | 2,919  | 12,711  | 3,308    | 6,576  | 4,542  |
| 13               | 4,762  | 14,348  | 6,228    | 11,256 | 8,362  |
| 14               | 36,633 | 14,306  | 5,404    | 39,869 | 5,716  |
| 15               | 1,935  | 10,103  | 3,709    | 5,730  | 4,375  |
| 16               | 3,561  | 11,935  | 5,510    | 9,986  | 6,950  |
| 17               | 5,522  | 13,900  | 7,551    | 16,807 | 9,620  |
| 18               | 3,103  | 12,375  | 5,470    | 8,289  | 6,882  |
| 19               | 1,528  | 8,937   | 1,547    | 2,400  | 2,188  |
| 20               | 2,014  | 9,939   | 3,603    | 5,068  | 4,548  |
| 21               | 3,464  | 12,428  | 5,914    | 10,093 | 7,580  |
| 22               | 1,524  | 9,245   | 2,952    | 4,232  | 3,563  |
| 23               | 2,447  | 10,378  | 3,624    | 5,291  | 4,819  |
| 24               | 3,287  | 11,844  | 4,035    | 6,597  | 5,165  |

**Table S5.** The number of total reported SV by each software.

## S.2. Performance of the software using simulated datasets and HG002

| Datasets            | Software | F1%    |        | Precision% |        | Recall% |        |
|---------------------|----------|--------|--------|------------|--------|---------|--------|
|                     |          | 100bp  | 2000bp | 100bp      | 2000bp | 100bp   | 2000bp |
| Simulated Dataset A | SENSV    | 42.29% | 42.49% | 27.78%     | 27.78% | 88.57%  | 88.57% |
|                     | NanoVar  | 17.25% | 17.25% | 10.26%     | 10.26% | 54.29%  | 54.29% |
|                     | Sniffles | 14.23% | 15.02% | 8.26%      | 8.72%  | 51.43%  | 54.29% |
|                     | SVIM     | 6.79%  | 7.45%  | 3.67%      | 4.04%  | 45.71%  | 48.57% |
|                     | cuteSV   | 28.21% | 28.21% | 18.44%     | 18.44% | 60.00%  | 60.00% |
| Simulated Dataset B | SENSV    | 49.12% | 49.12% | 36.04%     | 36.04% | 77.14%  | 77.14% |
|                     | NanoVar  | 12.36% | 12.36% | 7.31%      | 7.31%  | 40.00%  | 40.00% |
|                     | Sniffles | 11.03% | 11.03% | 6.33%      | 6.33%  | 42.86%  | 42.86% |
|                     | SVIM     | 6.55%  | 6.55%  | 3.35%      | 3.53%  | 45.71%  | 45.71% |
|                     | cuteSV   | 15.51% | 15.51% | 9.80%      | 9.80%  | 37.14%  | 37.14% |
| HG002               | SENSV    | 32.75% | 37.75% | 21.08%     | 24.59% | 73.31%  | 81.20% |
|                     | NanoVar  | 41.11% | 46.71% | 29.78%     | 34.66% | 66.35%  | 71.62% |
|                     | Sniffles | 35.49% | 41.29% | 27.34%     | 31.81% | 50.56%  | 58.83% |
|                     | SVIM     | 26.96% | 31.58% | 16.62%     | 19.65% | 71.24%  | 80.45% |
|                     | cuteSV   | 39.56% | 43.12% | 32.27%     | 35.35% | 51.13%  | 55.26% |

**Table S6.** The F1%, precision% and recall% for all software when using simulated datasets and HG002.



### S.3. Performance of SENS SV, NanoVar<sup>1</sup>, Sniffles<sup>2</sup>, SVIM<sup>3</sup> and cuteSV<sup>4</sup> on the simulated datasets for individual SV

| SV ID | SV length | SV type       | SENSV (heterozygous datasets) | SENSV (homozygous datasets) | NanoVar | Sniffles | SVIM | cuteSV |
|-------|-----------|---------------|-------------------------------|-----------------------------|---------|----------|------|--------|
| 1     | 39,438    | deletion      | Y                             | Y                           | Y       | Y        | Y    | Y      |
| 2     | 82,549    | deletion      | Y                             | Y                           | N       | N        | Y    | N      |
| 3     | 94,159    | deletion      | Y                             | Y                           | Y       | Y        | Y    | Y      |
| 4     | 10,117    | deletion      | Y                             | Y                           | Y       | Y        | Y    | Y      |
| 5     | 48,202    | deletion      | Y                             | Y                           | N       | Y        | Y    | Y      |
| 6     | 33,546    | deletion      | Y                             | Y                           | N       | N        | Y    | N      |
| 7     | 23,876    | deletion      | Y                             | Y                           | N       | N        | Y    | N      |
| 8     | 97,991    | deletion      | Y                             | Y                           | Y       | Y        | Y    | Y      |
| 9     | 34,940    | deletion      | Y                             | Y                           | N       | Y        | Y    | Y      |
| 10    | 62,420    | deletion      | Y                             | Y                           | N       | Y        | Y    | N      |
| 11    | 113,720   | long deletion | Y                             | Y                           | Y       | Y        | Y    | Y      |
| 12    | 838,659   | long deletion | Y                             | Y                           | Y       | Y-       | Y-   | N      |
| 13    | 498,160   | long deletion | Y                             | Y                           | N       | Y        | N    | Y      |
| 14    | 1,095,657 | long deletion | Y                             | Y                           | N       | N        | Y    | N      |
| 15    | 412,281   | long deletion | Y                             | Y                           | Y       | N        | N    | N      |
| 16    | 937,186   | long deletion | Y                             | Y                           | Y       | Y        | Y    | Y      |
| 17    | 509,473   | long deletion | Y                             | Y                           | N       | N        | N    | N      |
| 18    | 1,063,340 | long deletion | N                             | N                           | N       | N        | N    | N      |
| 19    | 119,059   | long deletion | Y                             | Y                           | Y       | N        | Y    | N      |
| 20    | 1,045,185 | long deletion | Y                             | Y                           | Y       | N        | Y    | N      |
| 21    | 940,447   | inversion     | Y                             | Y                           | Y       | Y        | N    | Y      |
| 22    | 930,177   | inversion     | Y                             | Y                           | Y       | Y        | Y    | Y      |
| 23    | 985,020   | inversion     | Y                             | Y                           | Y       | Y        | Y    | Y      |
| 24    | 43,362    | inversion     | Y                             | Y                           | Y       | Y        | Y    | Y      |
| 25    | 43,233    | inversion     | Y                             | Y                           | Y       | Y        | Y    | Y      |
| 26    | 40,819    | inversion     | N                             | Y                           | N       | N        | N    | N      |
| 27    | 45,234    | inversion     | Y                             | Y                           | Y       | Y        | N    | Y      |
| 28    | 41,191    | inversion     | Y                             | Y                           | Y       | Y        | N    | N      |
| 29    | 909,789   | inversion     | Y                             | Y                           | Y       | Y        | Y    | Y      |
| 30    | 940,949   | inversion     | Y                             | Y                           | Y       | Y        | N    | Y      |
| 31    | 470,496   | duplication   | Y                             | Y                           | N       | N        | N    | N      |
| 32    | 80,807    | duplication   | Y                             | Y                           | Y       | Y        | Y    | Y      |
| 33    | 116,822   | duplication   | Y                             | Y                           | N       | Y        | Y    | Y      |
| 34    | 47,269    | duplication   | Y                             | Y                           | Y       | Y        | Y    | Y      |
| 35    | 56,779    | duplication   | Y                             | Y                           | Y       | N        | N    | N      |

| SV ID | SV length | SV type                  | SENSV (heterozygous datasets) | SENSV (homozygous datasets) | NanoVar | Sniffles | SVIM | cuteSV |
|-------|-----------|--------------------------|-------------------------------|-----------------------------|---------|----------|------|--------|
| 36    | 896,748   | duplication              | Y                             | Y                           | N       | N        | Y    | N      |
| 37    | 1,189,698 | duplication              | Y                             | Y                           | N       | Y        | Y    | Y      |
| 38    | 55,797    | duplication              | N                             | Y                           | N       | N        | N    | N      |
| 39    | 499,008   | duplication              | N                             | Y                           | N       | N        | N    | N      |
| 40    | 40,566    | duplication              | Y                             | Y                           | Y       | N        | N    | N      |
| 41    | 850,000   | terminal deletion        | Y                             | Y                           | N       | N        | N    | N      |
| 42    | 600,000   | terminal deletion        | Y                             | Y                           | N       | N        | N    | Y      |
| 43    | 1,000,000 | terminal deletion        | Y                             | Y                           | N       | N        | N    | Y      |
| 44    | 800,000   | terminal deletion        | N                             | Y                           | N       | N        | N    | Y      |
| 45    | 900,000   | terminal deletion        | Y                             | Y                           | N       | N        | N    | N      |
| 46    | 2,500,000 | terminal deletion        | N                             | N                           | N       | N        | N    | N      |
| 47    | 3,000,000 | terminal deletion        | Y                             | Y                           | N       | N        | Y    | N      |
| 48    | 1,500,000 | terminal deletion        | Y                             | Y                           | N       | N        | Y    | N      |
| 49    | 1,000,000 | terminal deletion        | Y                             | Y                           | N       | N        | N    | N      |
| 50    | 2,720,000 | terminal deletion        | N                             | Y                           | N       | N        | N    | N      |
| 51    | N/A       | balanced translocation   | Y                             | Y                           | Y       | Y        | Y    | Y      |
| 52    | N/A       | balanced translocation   | N                             | Y                           | N       | N        | N    | N      |
| 53    | N/A       | balanced translocation   | Y                             | Y                           | Y       | Y        | N    | Y      |
| 54    | N/A       | balanced translocation   | Y                             | Y                           | Y       | Y        | N    | Y      |
| 55    | N/A       | balanced translocation   | N                             | Y                           | Y       | N        | N    | N      |
| 56    | N/A       | balanced translocation   | Y                             | Y                           | Y       | Y        | N    | Y      |
| 57    | N/A       | balanced translocation   | Y                             | Y                           | Y       | Y        | N    | Y      |
| 58    | N/A       | balanced translocation   | Y                             | Y                           | N       | N        | N    | N      |
| 59    | N/A       | balanced translocation   | Y                             | Y                           | Y       | Y        | Y    | Y      |
| 60    | N/A       | balanced translocation   | Y                             | Y                           | Y       | Y        | Y    | Y      |
| 61    | N/A       | unbalanced translocation | Y                             | Y                           | N       | N        | N    | N      |
| 62    | N/A       | unbalanced translocation | Y                             | Y                           | Y       | Y        | Y    | Y      |
| 63    | N/A       | unbalanced translocation | Y                             | Y                           | N       | N        | N    | N      |
| 64    | N/A       | unbalanced translocation | Y                             | Y                           | N       | N        | N    | N      |
| 65    | N/A       | unbalanced translocation | N                             | Y                           | N       | N        | N    | N      |
| 66    | N/A       | unbalanced translocation | Y                             | Y                           | Y       | Y        | Y    | Y      |
| 67    | N/A       | unbalanced translocation | N                             | Y                           | N       | N        | N    | N      |
| 68    | N/A       | unbalanced translocation | Y                             | Y                           | N       | N        | N    | N      |
| 69    | N/A       | unbalanced translocation | N                             | N                           | N       | N        | N    | N      |
| 70    | N/A       | unbalanced translocation | Y                             | Y                           | N       | Y        | N    | Y      |

**Table S7.** Comparison of SENSV, NanoVar, Sniffles and SVIM on the ability to detect the SV in the simulated datasets. Above, “Y” [and “Y-”] mean that a software can detect the SV with the correct SV type and with a breakpoint precision of 100 bp [and of 2,000 bp]; and “N” indicates the software is unable to detect the SV with breakpoint precision relaxed to 2,000 bp. Simulated datasets with SVs that share same breakpoints as before but homozygous are run with SENSV to show SENSV’s ability to detect homozygous SVs.

#### S.4. CPU Usage of SENSV for Simulated Datasets and low-depth HG002

|       | Dataset             | CPU usage |
|-------|---------------------|-----------|
| SENSV | Simulated Dataset A | 3,451.22% |
|       | Simulated Dataset B | 2,381.96% |
|       | HG002               | 2,972.94% |

**Table S8.** The CPU usage of SENSV for simulated datasets and HG002.

## S.5. The Algorithm of SV-DP

Let  $Q = q_1q_2 \dots q_n$  and  $R = r_1r_2\dots r_n$  be query sequence and reference sequence respectively, where  $n$  and  $m$  are the lengths of the sequences.

Substitution matrix  $s(q,r)$  defines the similarity score of two nucleotides  $q$  and  $r$ , and penalty function  $W(k)$  defines the penalty of a gap (deletion or insertion) with length  $k$ .

Scoring matrix  $H$  of our dynamic programming is a 3 dimensional table, and consists of 4 subtables.

$H[k][i][j]$  represents the best alignment of  $Q[1..i]$  and  $R[1..j]$ , with exactly  $k$  of the deletions has a zero penalty. In our SV detection application, only 1 free deletion is needed, and  $k$  will be either 0 or 1. In implementation, we use a circular buffer of size 2 (instead of size = query length) to represent the second dimension.

$H\_M[k][i][j]$  stores the best alignment that ends in match/mismatch (i.e.  $Q[i]$  is aligned to  $R[j]$ )

$H\_I[k][i][j]$  stores the best alignment that ends in insertion (i.e.  $Q[i]$  is in an insertion), while insertion length is recorded in a separate table  $I\_len[k][j][i]$ .

$H\_D[k][i][j]$  stores the best alignment that ends in deletion (i.e.  $R[j]$  is in a deletion), while deletion length is recorded in a separate table  $D\_len[k][j][k]$

$H\_F[k][i][j]$  stores the best alignment that ends in deletion and the deletion is of free penalty.

For all these 4 subtables, we stores not only scores, but also the positions of the deletion with free penalty, if any (starting position in reference, ending position in reference, query position).

We keep track of the best alignment while filling the scoring matrices and therefore a backtracking would not be necessary to retrieve the deletion with free penalty.

Initialization:

```
H_M[k][j][i] = 0,  
H_I[k][j][i] = -inf,  
H_D[k][j][i] = -inf,
```

$H\_F[k][j][i] = -inf,$

$I\_len[k][j][i] = D\_len[k][j][i] = -inf$

Transitions:

for  $i > 1, j > 1$

( $H\_M$  is written as  $M$ )

$I[k][i][j] = \max(M[k][i-1][j] + W(1), I[k][i-1][j] + W(1+1) - W(1))$  where  $l = I\_len[k][i-1][j]$

$D[k][i][j] = \max(M[k][i][j-1] + W(1), D[k][i][j-1] + W(1+1) - W(1))$  where  $l = D\_len[k][i][j-1]$

if  $k > 0$ :

$F[k][i][j] = \max(M[k-1][i][j-1], F[k-1][i][j-1])$

$M[k][i][j] = \max(I[k][i][j], D[k][i][j], F[k][i][j], M[k][i-1][j-1] + s(Q[i], R[j]))$

(supplementary information like  $I\_len$ ,  $D\_len$ , and position of deletion of free penalty are updated accordingly.)

$RET = \max(RET, M[k][i][j])$

Return Value:

RET

## S.6. Depth variability of the reference dataset in SENSV

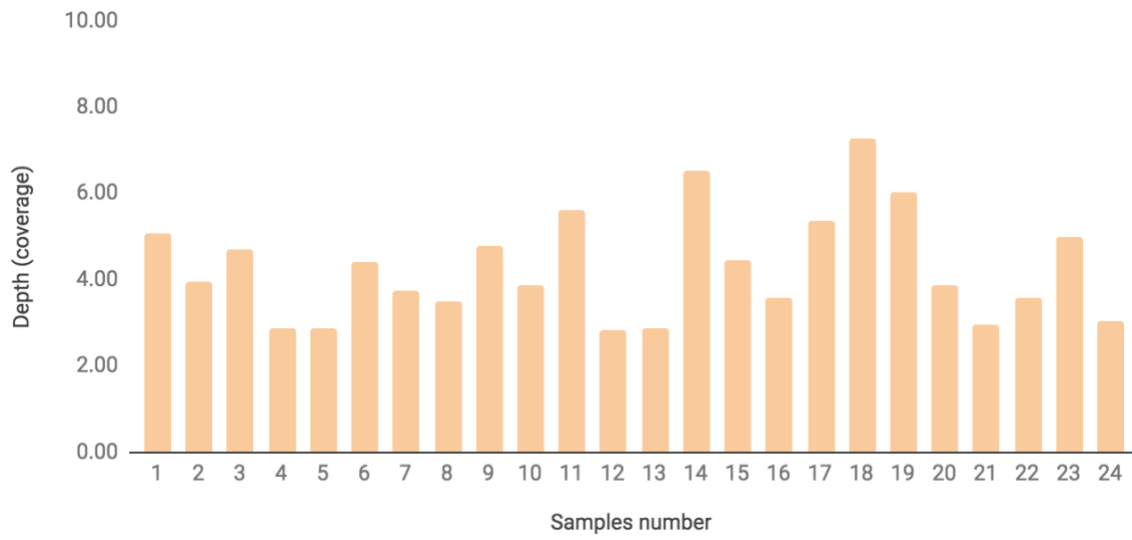

**Figure S1.** Sequencing depth of the samples for the reference dataset in SENSV

## S.7.Parameters and software version used for calling SV for low-depth (4x) WGS data

| Software          | Parameters                                                                                                                                              |
|-------------------|---------------------------------------------------------------------------------------------------------------------------------------------------------|
| SENSV             | --min_sv_size 1000                                                                                                                                      |
| Sniffles (1.0.11) | -s 2                                                                                                                                                    |
| SVIM (1.1.1)      | alignment --max_sv_size 250000000                                                                                                                       |
| NanoVar (1.2.6)   | -r hs37d5.fa                                                                                                                                            |
| ngmlr (0.2.7)     | -x ont                                                                                                                                                  |
| Minimap2 (2.17)   | -Y -t \${thread} -z 200 --MD -a -5                                                                                                                      |
| cuteSV (1.0.11)   | --max_cluster_bias_INS 100 --diff_ratio_merging_INS 0.3 --max_cluster_bias_DEL 100 --diff_ratio_merging_DEL 0.3 --min_support 2 --max_sv_size 250000000 |

**Table S9.** Parameters and versions used for the software when evaluating low-depth WGS data.

## S.8. Commands and parameters used for the evaluation

| Software                         | Command                                                                                                          |
|----------------------------------|------------------------------------------------------------------------------------------------------------------|
| SURVIVOR <sup>5</sup><br>(1.0.7) | SURVIVOR eval --vcf_results --true_set_bed2_format --100 (allowed error at the breakpoints) --output_dir         |
| bcftools <sup>6</sup>            | bcftools filter --i 'SVTYPE==(Type) '--vcf   bcftools filter --i 'SVLEN>=1000' or 'SVLEN<=-1000' (for deletions) |

**Table S10.** Commands and parameters used for counting the number of reported SV and true positives. The bcftools command has been used to gather the number of reported SV in different types for Section S.1 (Table S1 to Table S4).



## Reference

- 1 Tham, C. Y. *et al.* NanoVar: accurate characterization of patients' genomic structural variants using low-depth nanopore sequencing. *Genome Biol* **21**, 56, doi:10.1186/s13059-020-01968-7 (2020).
- 2 Sedlazeck, F. J. *et al.* Accurate detection of complex structural variations using single-molecule sequencing. *Nat Methods* **15**, 461-468, doi:10.1038/s41592-018-0001-7 (2018).
- 3 Heller, D. & Vingron, M. SVIM: structural variant identification using mapped long reads. *Bioinformatics* **35**, 2907-2915, doi:10.1093/bioinformatics/btz041 (2019).
- 4 Jiang, T. *et al.* Long-read-based human genomic structural variation detection with cuteSV. *Genome Biol* **21**, 189, doi:10.1186/s13059-020-02107-y (2020).
- 5 Jeffares, D. C. *et al.* Transient structural variations have strong effects on quantitative traits and reproductive isolation in fission yeast. *Nat Commun* **8**, 14061, doi:10.1038/ncomms14061 (2017).
- 6 Li, H. *et al.* The Sequence Alignment/Map format and SAMtools. *Bioinformatics* **25**, 2078-2079, doi:10.1093/bioinformatics/btp352 (2009).
